# Supplementary material
Source: Springer Nature journal article supplement (https://www.springermedizin.de/resource/supplementary/12891_2010_1117_MOESM1_ESM.pdf/9507732)

Force

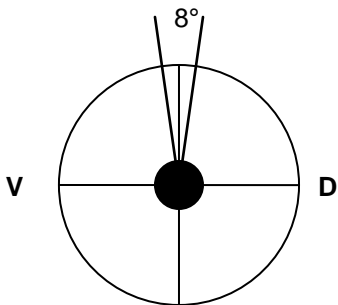

a.

Force

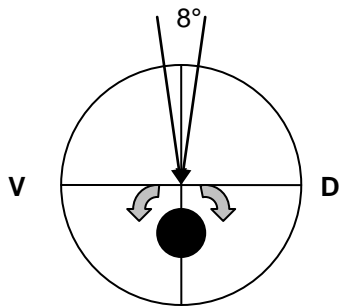

b.

Force

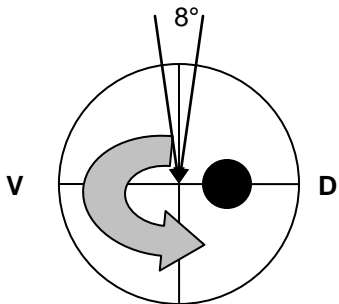

c.

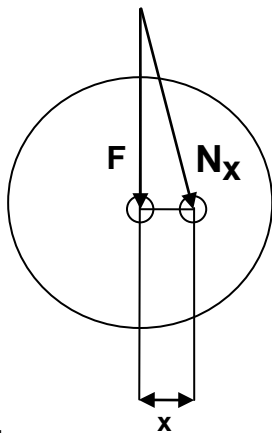

d.

Supplement: MOESM1 [file 9507732]
